# Supplementary material
Source: PubMed Central journal article supplement (PMC3275585)
Supplement: NIHMS353656-supplement-1.pdf [file NIHMS353656-supplement-1.pdf]

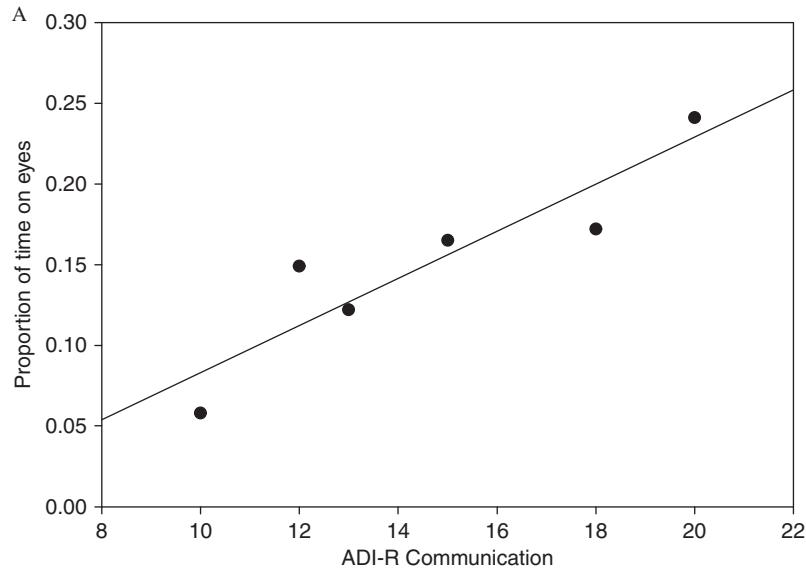

**Supplementary Figure A.** Positive correlation between dwell time on the eyes and scores on the ADI-R communication subscale,  $r = .91$ ,  $p < .025$ , for the ASD group (with one outlier removed), suggesting that individuals with ASD who were more impaired on communication spent more time looking at the eyes.

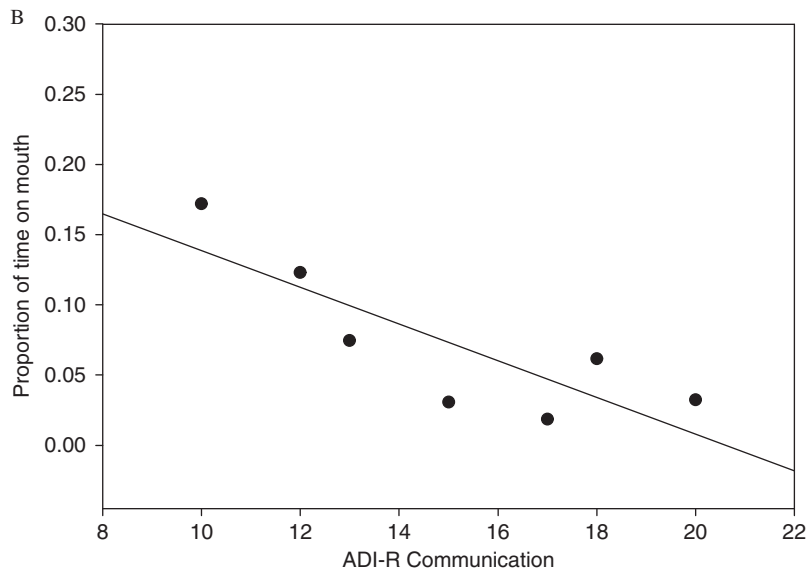

**Supplementary Figure B.** Negative correlation between dwell time on the mouth and scores on the ADI-R communication subscale for the ASD group,  $r = -.83$ ,  $p < .025$ , suggesting that individuals with ASD who were more impaired on communication spent less time looking at the mouth.
